# Supplementary material for: NEBULA is a fast negative binomial mixed model for differential or co-expression analysis of large-scale multi-subject single-cell data
Source: PubMed Central journal article supplement (PMC8155058; doi:10.1038/s42003-021-02146-6), 2021-05-26
Supplement: 42003_2021_2146_MOESM2_ESM.pdf [file 42003_2021_2146_MOESM2_ESM.pdf]

## Description of Additional Supplementary Files

### File name: Supplementary Data 1

**Description:** The proposed strategy for testing fixed-effects variables used in the analysis of the real data. This table summarizes the conditions under which an estimation algorithm (NEBULA-LN or NEBULA-HL) is used to estimate each of the over-dispersion parameters.

### File name: Supplementary Data 2

**Description:** Results of the cell-level co-expression analysis of BCL3 and TCF7 in memory CD4+ T cell populations in the PBMC scRNA-seq data.

### File name: Supplementary Data 3

**Description:** A list of top 1000 genes whose expression was correlated with the expression of APOE at the single-cell level in astrocytes and microglia in the human frontal cortex based on the p-values of the meta-analysis of the ROSMAP 48-subject and 32-subject snRNA-seq data sets. logFC<sub>48(32)</sub>: The log(fold change) of the association between the expression of the gene and APOE in the ROSMAP 48(32)-subject snRNA-seq data set. logFC>0 means a positive correlation, and logFC<0 means a negative correlation with the expression of APOE.

### File name: Supplementary Data 4

**Description:** A list of top 200 genes whose expression was correlated with the expression of APOE stratified by the APOE variants at the single-cell level in astrocytes in the human frontal cortex from the ROSMAP 48-subject snRNA-seq data set. logFC: The log(fold change) of the association between the expression of the gene and APOE. logFC>0 means a positive correlation, and logFC<0 means a negative correlation with the expression of APOE. APOE2: APOE e2e3. APOE3: APOE e3e3. APOE4: APOE e3e4 and APOE e4e4.

### File name: Supplementary Data 5

**Description:** A list of top 200 genes whose expression was correlated with the expression of APOE stratified by the APOE variants at the single-cell level in microglia in the human frontal cortex from the ROSMAP 48-subject snRNA-seq data set. logFC: The log(fold change) of the association between the expression of the gene and APOE. logFC>0 means a positive correlation, and logFC<0 means a negative correlation with the expression of APOE. APOE2: APOE e2e3. APOE3: APOE e3e3. APOE4: APOE e3e4 and APOE e4e4.

### File name: Supplementary Data 6

**Description:** A list of the marker genes identified by NEBULA to annotate the cell clusters in the PBMC scRNA-seq data set. Proportion of cells with presence: the percentage of cells having a positive count of the gene in that cluster. log(FC): the estimated log(FC) of this gene by NEBULA.
